# Supplementary material for: Social intolerance is a consequence, not a cause, of dispersal in spiders
Source: PubMed Central journal article supplement (PMC6605646; doi:10.1371/journal.pbio.3000319), 2019-07-02
Supplement: pbio.3000319.s002.pdf [file pbio.3000319.s002.pdf]

**S1 Table. Gregariousness is a common trait in solitary spiderlings.**

| <b>Infraorder</b> | <b>Family</b>  | <b>Genus</b>         | <b>Species</b>      | <b>Level of sociality</b>      | <b>Duration</b>                                                     | <b>Reference</b> |
|-------------------|----------------|----------------------|---------------------|--------------------------------|---------------------------------------------------------------------|------------------|
| Mygalomorphae     | Antrodiaetidae | <i>Aliatypus</i>     | <i>spp.</i>         | Transient subsocial            | Probably more than one month                                        | (1)              |
|                   | Atypidae       | <i>Sphodros</i>      | <i>fitchi</i>       | Transient subsocial            | Unknown                                                             | (2)              |
|                   |                | <i>Calommata</i>     | <i>signata</i>      | Transient subsocial            | 2 weeks                                                             | (3)              |
|                   | Ctenizidae     | <i>Stasimopus</i>    | <i>mandelai</i>     | Transient subsocial            | Unknown                                                             | (4)              |
|                   | Cyrtacheniidae | <i>Ancyloptrypa</i>  | <i>sp.</i>          | Transient subsocial            | Unknown                                                             | (5)              |
|                   | Migidae        | <i>Clathrotarsus</i> | <i>simoni</i>       | Transient subsocial            | 4 months                                                            | (6)              |
|                   | Theraphosidae  | <i>Brachypelma</i>   | <i>vagans</i>       | Transient subsocial            | A few weeks (at least until the 1 <sup>st</sup> molt)               | (7, 8)           |
|                   |                | <i>Eurypelma</i>     | <i>californicum</i> | Transient subsocial            | 1 -2 weeks                                                          | (9)              |
|                   | Araneomorphae  | Agelenidae           | <i>Agelena</i>      | <i>labyrinthica</i>            | Solitary                                                            | A few days       |
| Araneidae         |                | <i>Araneus</i>       | <i>diadematus</i>   | Solitary                       | > 3 days                                                            | (11)             |
|                   |                | <i>Argiope</i>       | <i>aurantia</i>     | Solitary                       | 3-8 days                                                            | (12)             |
|                   |                | <i>Argiope</i>       | <i>trifasciata</i>  | Solitary                       | 3-8 days                                                            | (12)             |
|                   |                | <i>Nephila</i>       | <i>clavipes</i>     | Solitary                       | Until 3 <sup>rd</sup> molt (and sometime more)                      | (13)             |
|                   |                | <i>Poecilopachys</i> | <i>australasia</i>  | Solitary                       | 4-13 days                                                           | (14)             |
| Austrochilidae    |                | <i>Hickmania</i>     | <i>troglydytes</i>  | Solitary                       | <1 month                                                            | (15)             |
| Clubionidae       |                | <i>Clubiona</i>      | <i>spp.</i>         | Transient subsocial            | Unknown                                                             | (16)             |
| Ctenidae          |                | <i>Cupiennius</i>    | <i>spp.</i>         | Solitary                       | 1 week                                                              | (17)             |
| Dictynidae        |                | <i>Dictyna</i>       | <i>coloradensis</i> | Solitary                       | End of 1 <sup>st</sup> instar - beginning of 2 <sup>nd</sup> instar | (18)             |
| Dysderidae        |                | <i>Dysdera</i>       | <i>crocata</i>      | Transient subsocial            | Unknown                                                             | (19)             |
| Eresidae          |                | <i>Stegodyphus</i>   | <i>africanus</i>    | Solitary / Transient subsocial | > 30 days                                                           | (20)             |
| Hypochilidae      |                | <i>Hypochilus</i>    | <i>thorelli</i>     | Solitary                       | Unknown                                                             | (21)             |
| Lycosidae         |                | <i>Hogna</i>         | <i>carolinensis</i> | Transient subsocial            | Until 1 week                                                        | (22)             |
|                   |                | <i>Lycosa</i>        | <i>georgicola</i>   | Transient subsocial            | Unknown                                                             | (23)             |
|                   |                | <i>Pardosa</i>       | <i>saltans</i>      | Transient subsocial            | Around 4 days                                                       | (24)             |
|                   |                | <i>Schizocosa</i>    | <i>ocreata</i>      | Transient subsocial            | 1 week                                                              | (25)             |
|                   |                | Oxyopidae            | <i>Peucetia</i>     | <i>viridans</i>                | Transient subsocial                                                 | A few days       |
| Pholcidae         |                | <i>Crossopriza</i>   | <i>lyoni</i>        | Transient subsocial            | > 2-4 days                                                          | (28)             |
|                   |                | <i>Holocnemus</i>    | <i>pluchei</i>      | Transient subsocial            | Until the 1 <sup>st</sup> molt                                      | (29)             |

|                |                    |                   |                                 |                                |          |
|----------------|--------------------|-------------------|---------------------------------|--------------------------------|----------|
| Salticidae     | <i>Portia</i>      | <i>fimbriata</i>  | Solitary                        | Unknown                        | (30)     |
|                | <i>Phidippus</i>   | <i>coccineus</i>  | Solitary                        | 2 weeks                        | (31)     |
| Sicariidae     | <i>Loxosceles</i>  | <i>gaucho</i>     | Transient subsocial / Subsocial | Unknown                        | (32)     |
| Tetrablemmidae | <i>Monoblemma</i>  | <i>muchmorei</i>  | Transient subsocial             | > 1 week                       | (33)     |
| Theridiidae    | <i>Achaeranea</i>  | <i>iepidorium</i> | Solitary                        | < 1 week                       | (34)     |
|                | <i>Latrodectus</i> | <i>hasselti</i>   | Transient subsocial             | 1 week                         | (35)     |
|                | <i>Latrodectus</i> | <i>hesperus</i>   | Transient subsocial             | 1 -2 weeks                     | (36, 37) |
| Thomisidae     | <i>Misumena</i>    | <i>vatia</i>      | Solitary / Transient subsocial  | Until the 2 <sup>nd</sup> molt | (38)     |
| Zodariidae     | <i>Lutica</i>      | <i>spp.</i>       | Transient subsocial             | Unknown                        | (39)     |

This table provides a non-exhaustive list of species of solitary (absence of the mothers when spiderlings emerge from the cocoon) and transient subsocial (maternal care ceases and spiderlings disperse when they start feeding [23]) spiders showing a transient gregarious phase at juvenile stages. The duration of gregariousness is indicated when available. For subsocial species, see [23].

1. Coyle FA, Icenogle WR. Natural history of the Californian trapdoor spider genus *Aliatypus* (Araneae, Antrodiaetidae). J Arachnol. 1994: 225-55.
2. Cutler B, Guarisco H. Dispersal aggregation of *Sphodros fitchi* (Araneae, Atypidae). J Arachnol. 1995;23: 205-6.
3. Kuwada-Kusunose T, Sakai T, Suzuki K. Observations of the early postembryonic development and dispersal of the purse-web spider *Calommata signata* (Araneae: Atypidae). Acta Arachnol. 2016;65: 43-7.
4. Hendrixson BE, Bond JE. A new species of *Stasimopus* from the Eastern Cape province of South Africa (Araneae, Mygalomorphae, Ctenizidae), with notes on its natural history. Zootaxa. 2004;619: 1-14.
5. Leroy A, Leroy J. Notes on the natural history of a trapdoor spider *Ancylotrypa* Simon (Araneae, Cyrtacheniiidae) that constructs a spherical burrow plug. J Arachnol. 2005;33: 558-62.
6. Ferretti N, Copperi S, Schwerdt L, Pompozzi G. Another migid in the wall: natural history of the endemic and rare spider *Calathotarsus simoni* (Mygalomorphae: Migidae) from a hill slope in central Argentina. J Nat Hist. 2014;48: 1907-21.
7. Reichling SB. Group dispersal in juvenile *Brachypelma vagans* (Araneae, Theraphosidae). J Arachnol. 2000;28: 248-51.
8. Dor A, Hénaut Y. Silk use and spiderling behavior in the tarantula *Brachypelma vagans* (Araneae: Theraphosidae). Acta Zool Mex. 2012;28.
9. Baerg WJ. Tarantula studies. J New York Entomol S. 1938;46: 31-43.
10. Mougénot F, Combe M, Jeanson R. Ontogenesis and dynamics of aggregation in a solitary spider. Anim Behav. 2012;84: 391-8.
11. Burch TL. The importance of communal experience to survival for spiderlings of *Araneus diadematus* (Araneae: Araneidae). J Arachnol. 1979: 1-18.
12. Tolbert WW. Aerial dispersal behavior of two orb weaving spiders. Psyche. 1977;84: 13-27.
13. Hill EM, Christenson TE. Effects of prey characteristics and web structure on feeding and predatory responses of *Nephila clavipes* spiderlings. Behav Ecol Sociobiol. 1981;8: 1-5.

14. May BM, Gardiner DI. Observations on the Australian "two spined" spider *Poeczlopachys australaszae* in an auckland garden. *Weta*. 1995;18: 1-5.
15. Doran N, Richardson A, Swain R. The reproductive behaviour of the Tasmanian cave spider *Hickmania troglodytes* (Araneae: Austrochilidae). *J Zool*. 2001;253: 405-18.
16. Austin A. Life history of *Clubiona robusta* L. Koch and related species (Araneae, Clubionidae) in South Australia. *J Arachnol*. 1984: 87-104.
17. Schmitt A, Schuster M, Barth FG. Daily locomotor activity patterns in three species of *Cupiennius* (Araneae, Ctenidae): The males are the wandering spiders. *J Arachnol*. 1990: 249-55.
18. Wheeler G, McCaffrey J, Johnson J. Developmental biology of *Dictyna spp.* (Araneae: Dictynidae) in the laboratory and field. *Am Midl Nat*. 1990: 124-34.
19. Guarisco H. Three species of house spiders first recorded in Kansas: *Dysdera crocata* (Dysderidae), *Scytodes thoracica* (Scytodidae), and *Cheiracanthium mildei* (Clubionidae). *Trans Kans Acad Sci*. 1991: 73-6.
20. Seibt U, Wickler I, Wickler W. Dispersal in the solitary *Stegodyphus africanus* and heterospecific grouping with the social *Stegodyphus dumicola* (Araneae, Eresidae). *J Arachnol*. 1998: 97-100.
21. Fergusson IC. Natural history of the spider *Hypochilus thorelli* Marx (Hypochilidae). *Psyche*. 1972;79: 179-99.
22. Punzo F, Alvarez J. Effects of early contact with maternal parent on locomotor activity and exploratory behavior in spiderlings of *Hogna carolinensis* (Araneae: Lycosidae). *J Insect Behav*. 2002;15: 455-65.
23. Miller GL. Subsocial organization and behavior in broods of the obligate burrowing wolf spider *Geolycosa turricola* (Treat). *Can J Zool*. 1989;67: 819-24.
24. Ruhland F, Pétilion J, Trabalon M. Physiological costs during the first maternal care in the wolf spider *Pardosa saltans* (Araneae, Lycosidae). *J Insect Physiol*. 2016;95: 42-50.
25. Toft S, Wise DH. Behavioral and ecophysiological responses of a generalist predator to single-and mixed-species diets of different quality. *Oecologia*. 1999;119: 198-207.
26. Willey MB, Adler PH. Biology of *Peucetia viridans* (Araneae, Oxyopidae) in South Carolina, with special reference to predation and maternal care. *J Arachnol*. 1989: 275-84.
27. Fink LS. Costs and benefits of maternal behaviour in the green lynx spider (Oxyopidae, *Peucetia viridans*). *Anim Behav*. 1986;34: 1051-60.
28. Strickman D, Sithiprasasna R, Southard D. Bionomics of the spider, *Crossopriza lyoni* (Araneae, Pholcidae), a predator of dengue vectors in Thailand. *J Arachnol*. 1997: 194-201.
29. Jakob EM, Dingle H. Food level and life history characteristics in a pholcid spider (*Holocnemus pluchei*). *Psyche*. 1990;97: 95-110.
30. Jackson R, Blest A. The biology of *Portia fimbriata*, a web-building jumping spider (Araneae, Salticidae) from Queensland: utilization of webs and predatory versatility. *J Zool*. 1982;196: 255-93.
31. Gardner BT. Observations on three species of *Phidippus* jumping spiders (Araneae: Salticidae). *Psyche*. 1965;72: 133-47.

32. Japyassú HF, Macagnan CR, Knysak I. Eggsac recognition in *Loxosceles gaucho* (Araneae, Sicariidae) and the evolution of maternal care in spiders. *J Arachnol.* 2003;31: 90-105.
33. Edwards RL, Edwards AD. Life history and ecology of the armored spider *Monoblemma muchmorei* (Araneae, Tetrablemmidae). *J Arachnol.* 2006;34: 599-610.
34. Valerio CE. A unique case of mutualism. *Am Nat.* 1975;109: 235-8.
35. Modanu M, Li LDX, Said H, Rathitharan N, Andrade MC. Sibling cannibalism in a web-building spider: Effects of density and shared environment. *Behav Process.* 2014;106: 12-6.
36. Salomon M, Vibert S, Bennett RG. Habitat use by western black widow spiders (*Latrodectus hesperus*) in coastal British Columbia: evidence of facultative group living. *Can J Zool.* 2010;88: 334-46.
37. Johnson JC, Kitchen K, Andrade MC. Family affects sibling cannibalism in the black widow spider, *Latrodectus hesperus*. *Ethology.* 2010;116: 770-7.
38. Morse DH. Do cannibalism and kin recognition occur in just-emerged crab spiderlings? *J Arachnol.* 2011;39: 53-9.
39. Ramirez MG. Natural history of the spider genus *Lutica* (Araneae, Zodariidae). *J Arachnol.* 1995;23: 111-7.
