# Supplementary material for: Social intolerance is a consequence, not a cause, of dispersal in spiders
Source: PubMed Central journal article supplement (PMC6605646; doi:10.1371/journal.pbio.3000319), 2019-07-02
Supplement: pbio.3000319.s003.pdf [file pbio.3000319.s003.pdf]

**S2 Table. Features of the paths of single spiderlings close to walls and far from walls in the dispersal arena.**

| Moving state   |              |                  |        |          |        |                |            |                         | Stopped state |          |         |
|----------------|--------------|------------------|--------|----------|--------|----------------|------------|-------------------------|---------------|----------|---------|
| Close to walls |              |                  |        |          |        | Far from walls |            |                         |               |          |         |
| Days           | $V_P$ (mm/s) | $1/\tau_P$ (1/s) | % Exit | % U-turn | % Stop | $V_C$ (mm/s)   | $l^*$ (mm) | $1/\tau_{Stop,C}$ (1/s) | Days          | $\alpha$ | $\beta$ |
| 0 to 11        | 6.5          | 0.196            | 10     | 61       | 29     | 6.5            | 10.66      | 0.023                   | 0 to 3        | 0.48     | 0.74    |
|                |              |                  |        |          |        |                |            |                         | 4 to 11       | 0.936    | 0.74    |

$V$  is the average speed,  $\tau_p$  is characteristic time before an exit, a U-turn or a stop in the external ring,  $l^*$  is the transport mean free path (i.e., the distance for which the random walk becomes uncorrelated),  $\tau_{Stop,C}$  is the characteristic time before a stop far from the walls. For stopped spiders,  $\alpha$  and  $\beta$  give the probability of moving (Eq 1). See [5,36,72] for details.
