# Supplementary material for: Social intolerance is a consequence, not a cause, of dispersal in spiders
Source: PubMed Central journal article supplement (PMC6605646; doi:10.1371/journal.pbio.3000319), 2019-07-02
Supplement: pbio.3000319.s004.pdf [file pbio.3000319.s004.pdf]

**S3 Table. Fraction of stopped spiderlings that moved after being collided and fraction of moving spiders that stopped in presence of N individuals. See [5] for details.**

| <u>Size of the aggregate</u> | <i>F<sub>Collision</sub></i> | <i>F<sub>Stop</sub></i> |
|------------------------------|------------------------------|-------------------------|
| N=1                          | 0.34                         | 0.27                    |
| N=2                          | 0.19                         | 0.37                    |
| N=3                          | 0.07                         | 0.55                    |
