# Supplementary material for: Social intolerance is a consequence, not a cause, of dispersal in spiders
Source: PubMed Central journal article supplement (PMC6605646; doi:10.1371/journal.pbio.3000319), 2019-07-02
Supplement: pbio.3000319.s005.pdf [file pbio.3000319.s005.pdf]

**S4 Table. Pairwise comparisons (chi-square tests with Holm’s correction) of the proportion of cannibalism in siblings of different ages and that experienced different treatments (see Fig 4).**

|                     | D0_Alone     | D0_5DSoc_Alone | D0_Socially  | D5_Alone     | D5_5DSoc_Alone | D5_Socially  | D10_Alone    | D10_5DSoc_Alone | D10_Socially | D15_Alone    | D15_5DSoc_Alone | D15_Socially | D20_Alone    | D20_5DSoc_Alone | D20_Socially |
|---------------------|--------------|----------------|--------------|--------------|----------------|--------------|--------------|-----------------|--------------|--------------|-----------------|--------------|--------------|-----------------|--------------|
| D20_5DSoc_Alone_Fed | 1.000        | 1.000          | <b>0.028</b> | <b>0.011</b> | <b>0.007</b>   | <b>0.001</b> | 1.000        | 0.230           | <b>0.009</b> | 1.000        | 1.000           | 0.107        | 1.000        | 1.000           | 1.000        |
| D20_Socially        | 1.000        | 1.000          | 1.000        | 1.000        | 1.000          | 1.000        | 1.000        | 1.000           | 1.000        | <b>0.039</b> | 1.000           | 1.000        | <b>0.000</b> | <b>0.010</b>    |              |
| D20_5DSoc_Alone     | <b>0.001</b> | <b>0.000</b>   | <b>0.002</b> | <b>0.001</b> | <b>0.001</b>   | <b>0.000</b> | 0.281        | <b>0.024</b>    | 0.001        | 1.000        | 1.000           | <b>0.010</b> | 1.000        |                 |              |
| D20_Alone           | <b>0.000</b> | <b>0.000</b>   | <b>0.000</b> | <b>0.000</b> | <b>0.000</b>   | <b>0.000</b> | <b>0.008</b> | <b>0.000</b>    | <b>0.000</b> | 1.000        | 1.000           | <b>0.000</b> |              |                 |              |
| D15_Socially        | 1.000        | 1.000          | 1.000        | 1.000        | 1.000          | 1.000        | 1.000        | 1.000           | 1.000        | <b>0.039</b> | 0.379           |              |              |                 |              |
| D15_5DSoc_Alone     | 1.000        | 1.000          | 0.106        | <b>0.047</b> | <b>0.030</b>   | <b>0.007</b> | 1.000        | 0.779           | <b>0.038</b> | 1.000        |                 |              |              |                 |              |
| D15_Alone           | <b>0.003</b> | <b>0.001</b>   | <b>0.009</b> | <b>0.004</b> | <b>0.003</b>   | <b>0.001</b> | 0.824        | 0.088           | <b>0.004</b> |              |                 |              |              |                 |              |
| D10_Socially        | 1.000        | 1.000          | 1.000        | 1.000        | 1.000          | 1.000        | 1.000        | 1.000           |              |              |                 |              |              |                 |              |
| D10_5DSoc_Alone     | 1.000        | 1.000          | 1.000        | 1.000        | 1.000          | 1.000        | 1.000        |                 |              |              |                 |              |              |                 |              |
| D10_Alone           | 1.000        | 1.000          | 1.000        | 1.000        | 1.000          | 1.000        |              |                 |              |              |                 |              |              |                 |              |
| D5_Socially         | 1.000        | 1.000          | 1.000        | 1.000        | 1.000          |              |              |                 |              |              |                 |              |              |                 |              |
| D5_5DSoc_Alone      | 1.000        | 1.000          | 1.000        | 1.000        |                |              |              |                 |              |              |                 |              |              |                 |              |
| D5_Alone            | 1.000        | 1.000          | 1.000        |              |                |              |              |                 |              |              |                 |              |              |                 |              |
| D0_Socially         | 1.000        | 1.000          |              |              |                |              |              |                 |              |              |                 |              |              |                 |              |
| D0_5DSoc_Alone      | 1.000        |                |              |              |                |              |              |                 |              |              |                 |              |              |                 |              |

D0, D5, D10, D15 or D20 indicates the age at which individuals were tested. “Socially,” “5DSoc\_Alone,” and “Alone” indicate that individuals were raised socially, socially until 5 Days then isolated, or in isolation, respectively. “Fed” indicates individuals that were fed three times. Relevant data values are included in S1 Data.
