# Supplementary material for: Social intolerance is a consequence, not a cause, of dispersal in spiders
Source: PubMed Central journal article supplement (PMC6605646; doi:10.1371/journal.pbio.3000319), 2019-07-02
Supplement: pbio.3000319.s006.pdf [file pbio.3000319.s006.pdf]

**S5 Table. List of cuticular compounds in 2nd-instar spiderlings of *A. labyrinthica* raised in social isolation or in groups.**

| No. Pic | Identification            | Isolated |       | Grouped |       | Tr    | KI   |
|---------|---------------------------|----------|-------|---------|-------|-------|------|
|         |                           | Mean     | SD    | Mean    | SD    |       |      |
| 1       | nC23                      | 0.13     | 0.068 | 0.165   | 0.121 | 17.48 | 2300 |
| 2       | 2,x-dimethylC23           | 0.145    | 0.055 | 0.19    | 0.116 | 18.3  | 2412 |
| 3       | 2,y-dimethylC23           | 0.157    | 0.053 | 0.236   | 0.151 | 18.35 | 2417 |
| 4       | 2-MethylC24               | 0.02     | 0.028 | 0.024   | 0.04  | 18.8  | 2468 |
| 5       | nC25                      | 3.86     | 1.214 | 3.768   | 1.087 | 19.1  | 2500 |
| 6       | 11,12-diMethylC24         | 0.204    | 0.094 | 0.209   | 0.095 | 19.36 | 2535 |
| 7       | 7-MethylC25               | 0.079    | 0.036 | 0.072   | 0.046 | 19.42 | 2542 |
| 8       | 5-MethylC25               | 0.061    | 0.025 | 0.068   | 0.057 | 19.49 | 2552 |
| 9       | 2-MethylC25               | 0.08     | 0.08  | 0.076   | 0.078 | 19.58 | 2564 |
| 10      | 3-MethylC25               | 0.226    | 0.039 | 0.233   | 0.09  | 19.66 | 2574 |
| 11      | 9,x-dimethylC25           | 0.2      | 0.084 | 0.198   | 0.074 | 19.72 | 2581 |
| 12      | nC26                      | 1.249    | 0.19  | 1.3     | 0.292 | 19.86 | 2600 |
| 13      | 2,y-dimethylC25           | 0.08     | 0.03  | 0.083   | 0.049 | 19.98 | 2616 |
| 14      | 11,x-dimethylC25          | 0.055    | 0.04  | 0.045   | 0.041 | 20.08 | 2629 |
| 15      | 11,12-diMethylC25         | 0.177    | 0.039 | 0.18    | 0.03  | 20.13 | 2636 |
| 16      | 7-MethylC26               | 0.021    | 0.025 | 0.029   | 0.035 | 20.2  | 2646 |
| 17      | 2-MethylC26               | 0.537    | 0.22  | 0.592   | 0.352 | 20.33 | 2663 |
| 18      | 3-MethylC26               | 0.078    | 0.034 | 0.085   | 0.04  | 20.41 | 2674 |
| 19      | nC27                      | 21.809   | 2.676 | 21.581  | 2.493 | 20.6  | 2700 |
| 20      | 11,12-diMethylC26         | 9.46     | 3.86  | 9.406   | 2.645 | 20.84 | 2733 |
| 21      | 7-MethylC27               | 3.773    | 1.779 | 3.711   | 1.055 | 20.9  | 2742 |
| 22      | 5-MethylC27               | 1.295    | 0.414 | 1.392   | 0.416 | 20.97 | 2751 |
| 23      | 2-MethylC27               | 2.027    | 2.569 | 2.572   | 3.227 | 21.05 | 2763 |
| 24      | 3-MethylC27               | 14.05    | 4.783 | 13.55   | 3.832 | 21.13 | 2774 |
| 25      | nC28                      | 1.21     | 0.295 | 1.242   | 0.316 | 21.32 | 2800 |
| 26      | 8,x-dimethylC27           | 0.466    | 0.176 | 0.536   | 0.177 | 21.36 | 2805 |
| 27      | 8,y-dimethylC27           | 0.37     | 0.144 | 0.363   | 0.179 | 21.38 | 2808 |
| 28      | 11,12-diMethylC27         | 0.765    | 0.295 | 0.807   | 0.285 | 21.55 | 2833 |
| 29      | 7-MethylC28 x-MethylC28:1 | 0.555    | 0.894 | 0.279   | 0.294 | 21.59 | 2840 |
| 30      | 2-MethylC28               | 2.304    | 1.303 | 2.298   | 1.212 | 21.75 | 2863 |
| 31      | 3-MethylC28               | 0.281    | 0.113 | 0.301   | 0.117 | 21.82 | 2872 |
| 32      | nC29                      | 5.191    | 2.278 | 4.938   | 0.996 | 22.01 | 2900 |
| 33      | 11,12-diMethylC28         | 6.606    | 1.755 | 7.265   | 2.397 | 22.23 | 2933 |
| 34      | 7-MethylC29               | 2.683    | 0.981 | 2.584   | 0.652 | 22.28 | 2941 |
| 35      | 5-MethylC29               | 1.21     | 0.159 | 1.215   | 0.148 | 22.35 | 2951 |
| 36      | 11,y-dimethylC29          | 1.728    | 0.691 | 1.616   | 0.843 | 22.4  | 2959 |
| 37      | 2-MethylC29               | 2.48     | 1.093 | 2.435   | 1.025 | 22.43 | 2963 |
| 38      | 11,x-dimethylC29          | 0.2      | 0.436 | 0.418   | 0.659 | 22.47 | 2969 |
| 39      | 3-MethylC29               | 4.194    | 1.926 | 3.906   | 1.613 | 22.51 | 2975 |
| 40      | NI                        | 0.093    | 0.169 | 0.122   | 0.129 | 22.63 | 2994 |
| 41      | nC30                      | 0.382    | 0.33  | 0.349   | 0.159 | 22.68 | 3000 |
| 42      | 8,x-dimethylC29           | 0.459    | 0.103 | 0.458   | 0.061 | 22.72 | 3008 |
| 43      | 11,12-diMethylC29         | 0.412    | 0.101 | 0.454   | 0.124 | 22.89 | 3033 |
| 44      | 2-MethylC30               | 0.768    | 0.302 | 0.836   | 0.228 | 23.08 | 3063 |
| 45      | nC31                      | 0.495    | 0.353 | 0.416   | 0.14  | 23.32 | 3100 |
| 46      | 11,12-diMethylC30         | 1.623    | 1.014 | 1.68    | 0.635 | 23.52 | 3132 |
| 47      | 7-MethylC31               | 0.505    | 0.186 | 0.532   | 0.311 | 23.58 | 3140 |
| 48      | 11,y-dimethylC31          | 2.114    | 1.129 | 2.121   | 0.731 | 23.68 | 3157 |
| 49      | 9,x-dimethylC25           | 0.419    | 0.118 | 0.408   | 0.108 | 23.83 | 3181 |
| 50      | nC32                      | 0.095    | 0.059 | 0.115   | 0.041 | 23.99 | 3200 |
| 51      | 11,x-dimethylC31          | 0.174    | 0.149 | 0.183   | 0.112 | 24.14 | 3229 |
| 52      | 5-MethylC32               | 0.655    | 0.338 | 0.738   | 0.244 | 24.3  | 3255 |
| 53      | 11,x-dimethylC32          | 0.355    | 0.28  | 0.344   | 0.146 | 24.79 | 3328 |
| 54      | 5-MethylC33               | 0.774    | 0.706 | 0.625   | 0.366 | 24.97 | 3354 |
| 55      | 11,x-dimethylC33          | 0.67     | 0.461 | 0.652   | 0.391 | 25.7  | 3424 |

Mean and SD of the relative abundance of cuticular compounds. Spiderlings from three cocoons were used (see S8 Fig). “x” indicates uncertain methyl group position. Relevant data values are included in S1 Data. KI, Kovat's indices; Tr: retention time (min).
